# Supplementary material for: Identification of Three Type II Toxin-Antitoxin Systems in Streptococcus suis Serotype 2
Source: MDPI journal article supplement (doi:10.3390/toxins10110467), 2018-11-13
Supplement: s1 [file s1]

# Supplementary Materials: Identification of novel three Type II Toxin-Antitoxin Sysems in *Streptococcus suis* serotype 2

Jiali Xu, Nian Zhang, Manman Cao, Sujing Ren, Ting Zeng, Minglu Qin, Xigong Zhao, Fangyan Yuan, Huanchun Chen and Weicheng Bei

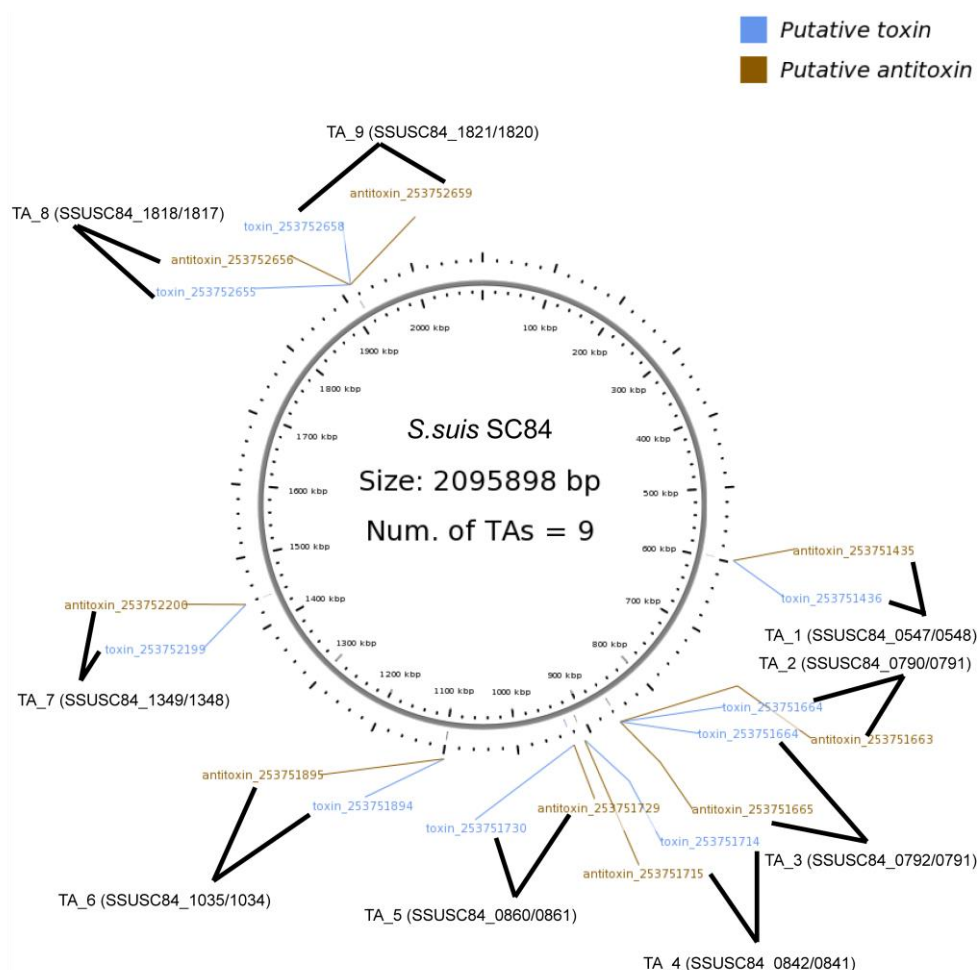

**Figure S1.** Genomic location of nine putative type II toxin-antitoxin (TA) systems in the chromosome of *S. suis* SC84. The ID numbers of each putative toxin or antitoxin are included (toxin\_No. or antitoxin\_No.) in the figure.

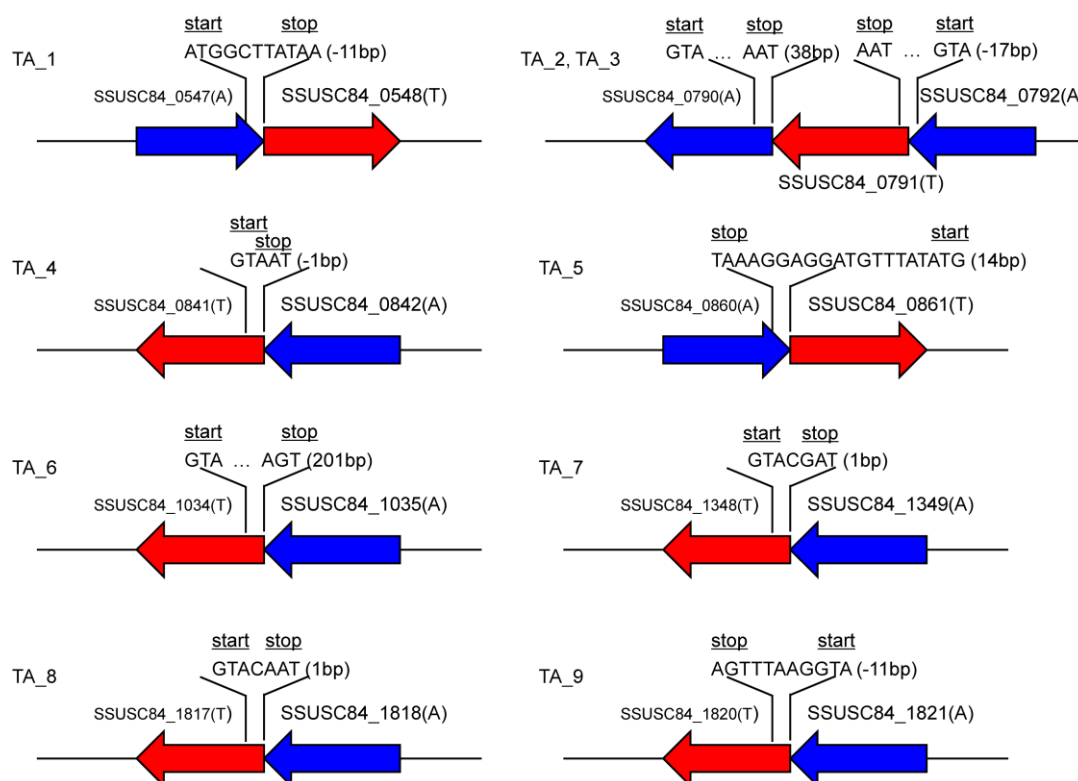

**Figure S2.** Genetic organization of nine putative type II toxin-antitoxin (TA) systems. The arrows indicate the direction of the transcription and do not represent the exact length. Red arrows represent putative toxins, and blue arrows represent putative antitoxins.

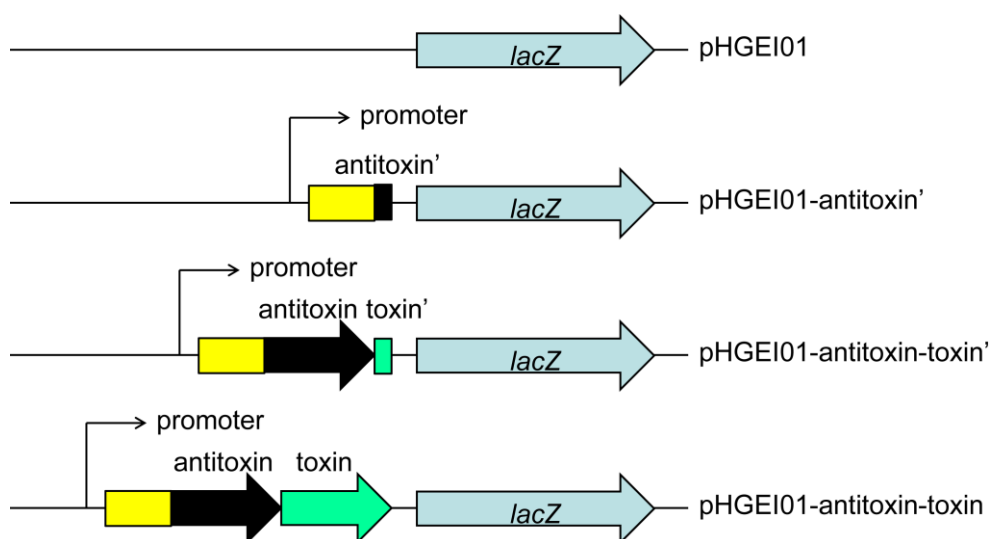

**Figure S3.** Schematic representation of the constructed reporter systems for the promoter activity assay.

**Table S1.** Bacterial strains and plasmids used in this study.

| Strain or plasmid            | Relevant characteristics <sup>a</sup>                                                                                              | Source or reference   |
|------------------------------|------------------------------------------------------------------------------------------------------------------------------------|-----------------------|
| <b>Strains</b>               |                                                                                                                                    |                       |
| SC19                         | Virulent strain isolated from the brain of a dead pig; Serotype 2                                                                  | Laboratory collection |
| <i>E. coli</i>               |                                                                                                                                    |                       |
| DH5 $\alpha$                 | Cloning host for recombinant vector                                                                                                | TransGen              |
| TOP10                        | The expression host for pBADhisA and its derivative                                                                                | TransGen              |
| BL21 (DE3) pLysS             | The expression host for pET-30a, pETBAD and their derivative                                                                       | TransGen              |
| WM3064                       | <i>thrB1004 pro thi rpsL hsdS lacZ</i> $\Delta$ M15 RP4-1360 $\Delta$ ( <i>araBAD</i> )567 $\Delta$ <i>dapA1341::[erm pir(wt)]</i> | Metcalf, W.; UIUC     |
| <b>Plasmids</b>              |                                                                                                                                    |                       |
| pETBAD                       | Selective expression vector with the pET-30a background; Kan <sup>R</sup>                                                          | [10]                  |
| pETBAD-0547-0548             | pETBAD containing the 0547 and 0548 genes                                                                                          | This study            |
| pETBAD-0790-0791             | pETBAD containing the 0790 and 0791 genes                                                                                          | This study            |
| pETBAD-0792-0791             | pETBAD containing the 0792 and 0791 genes                                                                                          | This study            |
| pETBAD-0842-0841             | pETBAD containing the 0842 and 0841 genes                                                                                          | This study            |
| pETBAD-0860-0861             | pETBAD containing the 0860 and 1820 genes                                                                                          | This study            |
| pETBAD-1035-1034             | pETBAD containing the 1035 and 1034 genes                                                                                          | This study            |
| pETBAD-1349-1348             | pETBAD containing the 1349 and 1348 genes                                                                                          | This study            |
| pETBAD-1818-1817             | pETBAD containing the <i>yefM<sub>ssu</sub></i> and <i>yoeB</i> genes                                                              | This study            |
| pETBAD-1821-1820             | pETBAD containing the 1821 and 1820 genes                                                                                          | This study            |
| pBADhisA                     | Expression vector; Amp <sup>R</sup>                                                                                                | Invitrogen            |
| pBADhisA-0548                | pBADhisA containing the SSUSC84_0548 gene                                                                                          | This study            |
| pBADhisA-0861                | pBADhisA containing the SSUSC84_0861 gene                                                                                          | This study            |
| pBADhisA-1348                | pBADhisA containing the SSUSC84_1348 gene                                                                                          | This study            |
| pBADhisA-1820                | pBADhisA containing the SSUSC84_1820 gene                                                                                          | This study            |
| pET-30a                      | Expression vector; Kan <sup>R</sup>                                                                                                | Novagen               |
| pET-30a-0547                 | pET-30a containing the SSUSC84_0547 gene                                                                                           | This study            |
| pET-30a-0860                 | pET-30a containing the SSUSC84_0860 gene                                                                                           | This study            |
| pET-30a-1349                 | pET-30a containing the SSUSC84_1349 gene                                                                                           | This study            |
| pET-30a-1821                 | pET-30a containing the SSUSC84_1821 gene                                                                                           | This study            |
| pHGEI01                      | Kan <sup>R</sup> , R6K <i>ori</i> , pHGC01 containing the full-length <i>E. coli lacZ</i> gene                                     | [28]                  |
| pHGEI01- <i>relB1'</i>       | pHGEI01 containing the promoter of SSUSC84_0547/0548                                                                               | This study            |
| pHGEI01- <i>relB1-relE1'</i> | pHGEI01 containing the promoter of SSUSC84_0547/0548 and SSUSC84_0547                                                              | This study            |
| pHGEI01- <i>relB1-relE1</i>  | pHGEI01 containing SSUSC84_0547/0548 and its promoter                                                                              | This study            |
| pHGEI01- <i>relB2'</i>       | pHGEI01 containing the promoter of SSUSC84_1349/1348                                                                               | This study            |
| pHGEI01- <i>relB2-relE2'</i> | pHGEI01 containing the promoter of SSUSC84_1349/1348 and SSUSC84_1349                                                              | This study            |
| pHGEI01- <i>relB2-relE2</i>  | pHGEI01 containing SSUSC84_1349/1348 and its promoter                                                                              | This study            |
| pHGEI01- <i>parD'</i>        | pHGEI01 containing the promoter of SSUSC84_1821/1820                                                                               | This study            |
| pHGEI01- <i>parD-parE'</i>   | pHGEI01 containing the promoter of SSUSC84_1821/1820 and SSUSC84_1821                                                              | This study            |
| pHGEI01- <i>parD-parE</i>    | pHGEI01 containing SSUSC84_1821/1820 and its promoter                                                                              | This study            |

<sup>a</sup> Amp<sup>R</sup> and Kan<sup>R</sup> indicate ampicillin and kanamycin resistance, respectively.

Table S2. Primers used in this study.

| Primer               | Sequence (5'-3') <sup>a</sup>                    | Target gene  |
|----------------------|--------------------------------------------------|--------------|
| 0547F                | CGGCGGTACCATGGGAATTGTATCCTTGCG                   | SSUSC84_0547 |
| 0547R                | CGCCGAATTCCTATAAGCCATCTCTAACTCCG                 |              |
| 0548F                | CCCCGTCGACATGGCTTATAAGCTTGTCTCAG                 | SSUSC84_0548 |
| 0548R                | CGCCGAATTCATTTTTATAGATTCTTTCCG                   |              |
| 0790F                | CGGCGGTACCATGAAAAAGAGAAGATTATATTGTT              | SSUSC84_0790 |
| 0790R                | CCGCGAGCTCTCATTGATCAAGTACCCAC                    |              |
| 0791F                | CCCCAAGCTTATGAAGACCTGTTATAAACTCGTAC              | SSUSC84_0791 |
| 0791R                | CCGCGAGCTCTTATATACTTCCATTTCTCATTTTTAT            |              |
| 0792F                | CGGCGGTACCATGGCAGCTATTACATTGAAAGT                | SSUSC84_0792 |
| 0792R                | CCGCGAGCTCTTATAACAGGTCTTCATCCGTCA                |              |
| 0841F                | CCCCAAGCTTATGAGGTTGGAAGAATTTAGTGA                | SSUSC84_0841 |
| 0841R                | CCGCGAGCTCTCATTCTTCTCTCCATTAGCTG                 |              |
| 0842F                | CGGCGGTACCATGATCGGAGACAATATAAAATCA               | SSUSC84_0842 |
| 0842R                | CGCCGAATTCCTAAGCCACCACCCGATG                     |              |
| 0860F                | CGGCGGTACCATGACTACGGCAGAAATGATTA                 | SSUSC84_0860 |
| 0860R                | CGCCGAGCTCTTATTCGTTAGATATTTTTATTCTCTCT           |              |
| 0861F                | CCCCGTCGACATGGTAGGTAATGTTATTCAAATAGTA            | SSUSC84_0861 |
| 0861R                | CCGCGAGCTCTCATATTTGTTTCTTTTCATCTGA               |              |
| 1034F                | CCCCAAGCTTATGCAGATTGATCCTATACGTTT                | SSUSC84_1034 |
| 1034R                | CCGCGAGCTCTTATCCTTTCTGGTGCAAAGG                  |              |
| 1035F                | CGGCGGTACCATGTCAAACATTGAACAACAGTT                | SSUSC84_1035 |
| 1035R                | CGCCGAATTCCTCAAACTGCTCCGAGAATC                   |              |
| 1348F                | CCCCGTCGACATGTATCATTAGAGTATTCTAAAAAGG            | SSUSC84_1348 |
| 1348R                | CGCCGAATTCCTCAATAGACATCTTACGATGTCC               |              |
| 1349F                | CGGCGGTACCATGAGTACAGTGACAATCAGATTAAAT            | SSUSC84_1349 |
| 1349R                | CGCCGAATTCCTATAATCCTAGCTCTTTCTTAAAAATC           |              |
| 1817F                | CCCCAAGCTTATGGGAATCCATTTTACAGAC                  | SSUSC84_1817 |
| 1817R                | CCGCGAGCTCTCACCTATAATGATCCTTTAGCG                |              |
| 1818F                | CGGCGGTACCATGGAAGCTATTGTATATTCCCAT               | SSUSC84_1818 |
| 1818R                | CGCCGAATTCCTAGTCCGCCTCTATCAGGTT                  |              |
| 1820F                | CCCCAAGCTTATGGAATTTGAGTCTTATTCAGTG               | SSUSC84_1820 |
| 1820R                | CCGCGAGCTCTCACTTCAACAACCTTCACATAATC              |              |
| 1821F                | CGGCGGTACCTTGATAACTATAAATAAAGATGCC               | SSUSC84_1821 |
| 1821R                | CGCCGAATTCCTCAAATTCATACCTCTCTTTGAC               |              |
| T0548F               | CCGCGAGCTCATGGCTTATAAGCTTGTCTCAG                 | SSUSC84_0547 |
| T0548R               | CGCCGAATTCATTTTTATAGATTCTTTCCG                   |              |
| T0791F               | CCGCGAGCTCATGAAGACCTGTTATAAACTCGTAC              | SSUSC84_0791 |
| T0791R               | CGCCGAATTCCTATATACTTCCATTTCTCATTTTTAT            |              |
| T0861F               | CCGCGAGCTCATGGTAGGTAATGTTATTCAAATAGTA            | SSUSC84_0861 |
| T0861R               | AAAACTGCACTCATATTTGTTTCTTTTCATCTGA               |              |
| T1034F               | CCGCGAGCTCATGCAGATTGATCCTATACGTTT                | SSUSC84_1034 |
| T1034R               | CGCCGAATTCCTATCCTTTCTGGTGCAAAGG                  |              |
| T1348F               | CCGCGAGCTCATGTATCATTAGAGTATTCTAAAAAGG            | SSUSC84_1348 |
| T1348R               | CGCCGAATTCCTCAATAGACATCTTACGATGTCC               |              |
| T1820F               | CCGCGAGCTCATGGAATTTGAGTCTTATTCAGTG               | SSUSC84_1820 |
| T1820R               | CGCCGAATTCCTCACTTCAACAACCTTCACATAATC             |              |
| pHGEI01-P0547-0548-F | CCGGAATTCAGTTTTTCCTTATTACGTCGAC                  |              |
| pHGEI01-0547'-R1     | AGCTGTTTCCTGTGTGAGATCTAATTTCTTCTCTGCATCGTTT      |              |
| pHGEI01-0548'-R1     | AGCTGTTTCCTGTGTGAGATCTCAACTGCTTCAAAGCATCATC      |              |
| pHGEI01-0547-0548-R1 | AGCTGTTTCCTGTGTGAGATCTCATTTTATAGATTCTTTCCG       |              |
| pHGEI01-common-R2    | CGCGGATCCGTAATCATGGTCATAGCTGTTTCTGTGTGAGATCT     |              |
| pHGEI01-P1349-1348-F | CCGGAATTCAGTAAGAACAAGTCTGGAAATTTT                |              |
| pHGEI01-1349'-R1     | AGCTGTTTCCTGTGTGAGATCTGAATACTTCTTCTTGTATTAATCT   |              |
| pHGEI01-1348'-R1     | AGCTGTTTCCTGTGTGAGATCTCATAATTTGCTTTTGAGCCTT      |              |
| pHGEI01-1349-1348-R1 | AGCTGTTTCCTGTGTGAGATCTTCAATAGACATCTTACGATGTCC    |              |
| pHGEI01-P1821-1820-F | CCGGAATTCGAGAGCCGTTGTTTCATAT                     |              |
| pHGEI01-1821'-R1     | AGCTGTTTCCTGTGTGAGATCTATCAGTTTTAAATTTACTTGGGC    |              |
| pHGEI01-1820'-R1     | AGCTGTTTCCTGTGTGAGATCTCTCCACTGCTGGAGCAAGTAT      |              |
| pHGEI01-1821-1820-R1 | AGCTGTTTCCTGTGTGAGATCTTCACTTCAACAACCTTCACATAATCA |              |

<sup>a</sup> The underlined sequences are restriction sites.
